# Supplementary material for: Effectiveness of Whole-Body High-Intensity Interval Training on Health-Related Fitness: A Systematic Review and Meta-Analysis
Source: MDPI journal article supplement (doi:10.3390/ijerph19159559), 2022-08-03
Supplement: s1 [file s1]

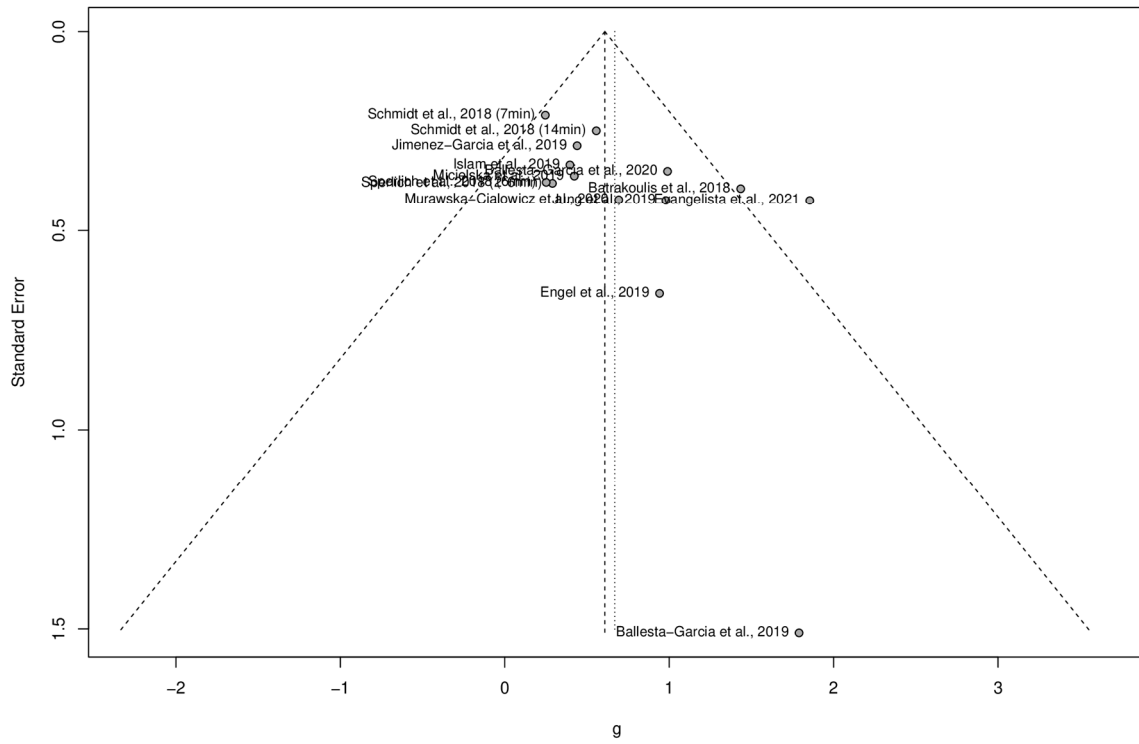

Figure S1. funnel noexercise

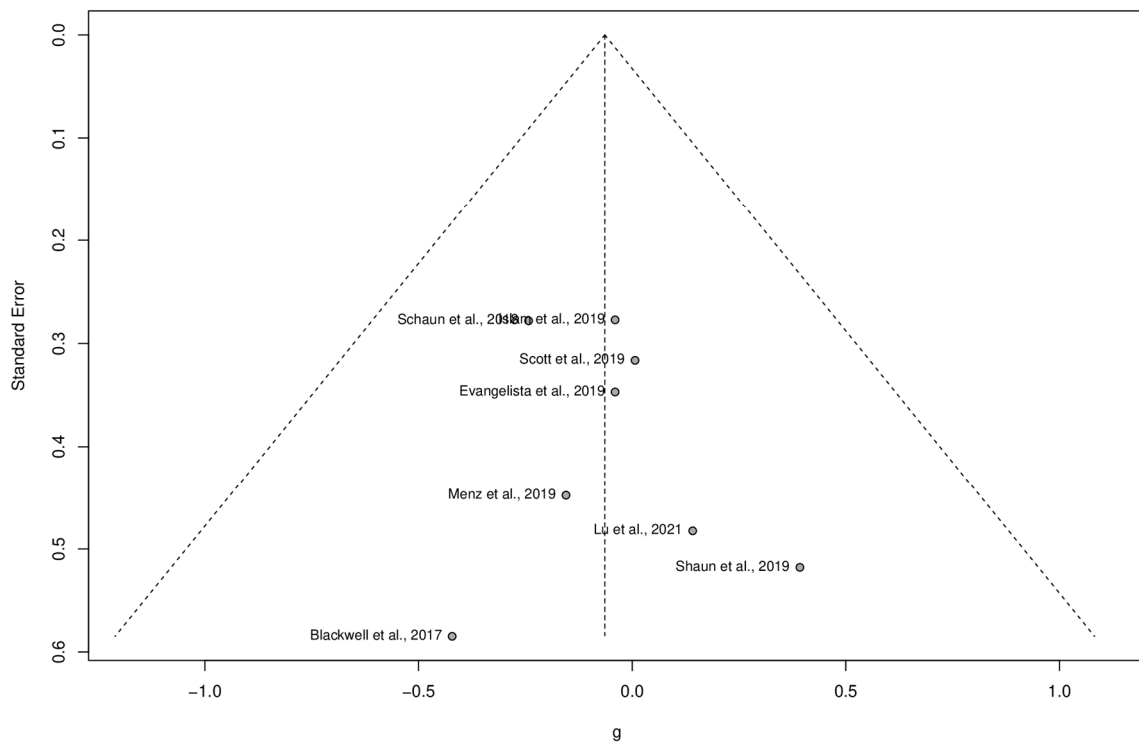

Figure S2. funnel active

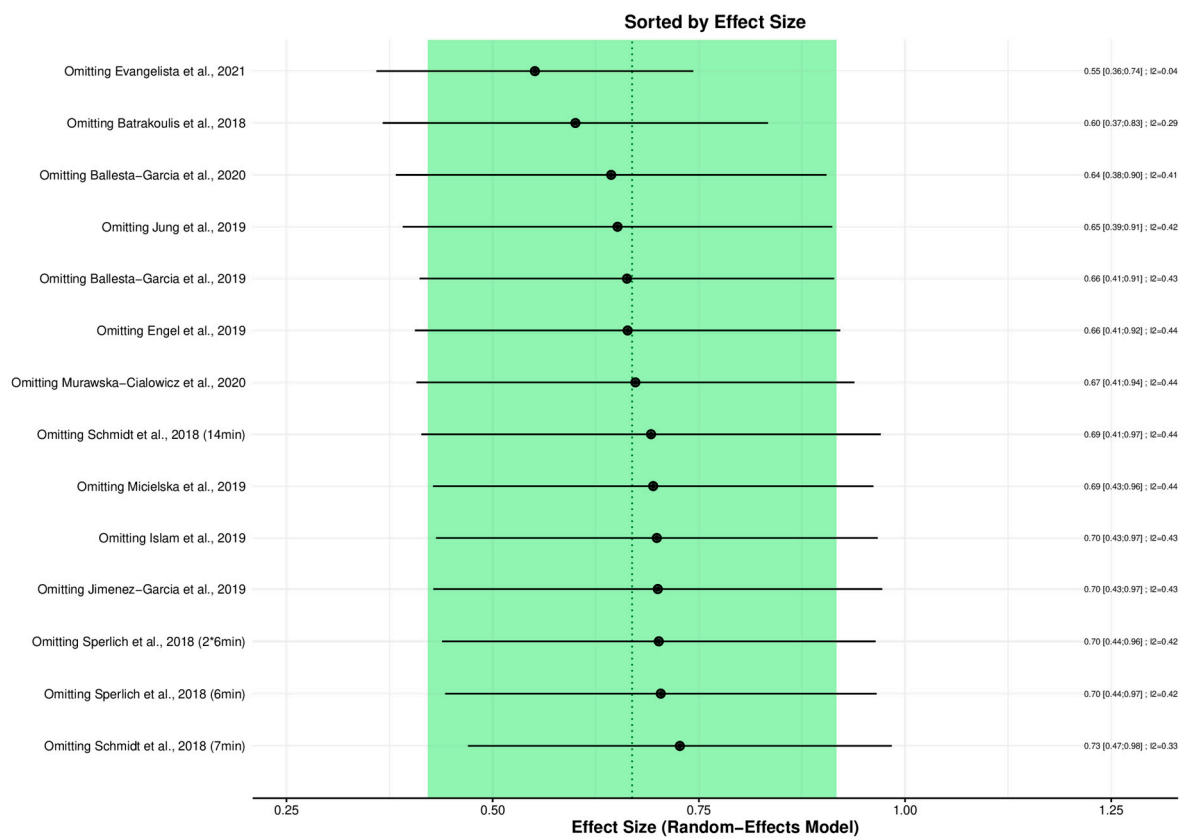

Figure S3. sensitivity noexercise

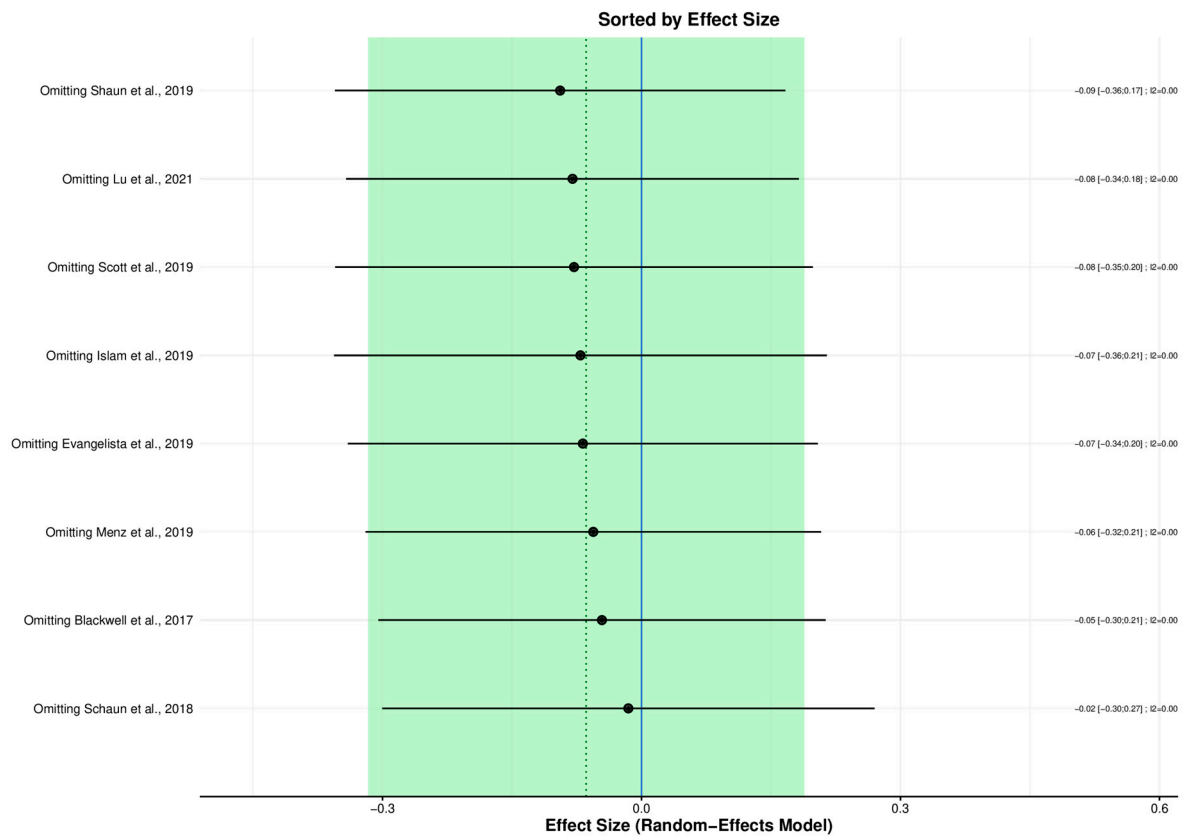

Figure S4. sensitivity active
